# Supplementary material
Source: Springer Nature journal article supplement (https://www.springermedizin.de/resource/supplementary/12885_2009_2090_MOESM8_ESM.pdf/9460502)

**A****Distribution of proteins according to biological process**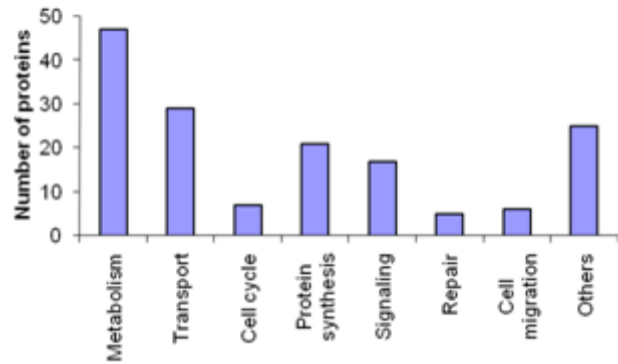**B****Distribution of proteins according to subcellular localization**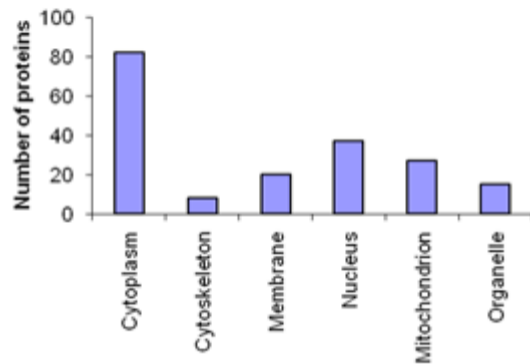**C****Distribution of proteins according to fold-change**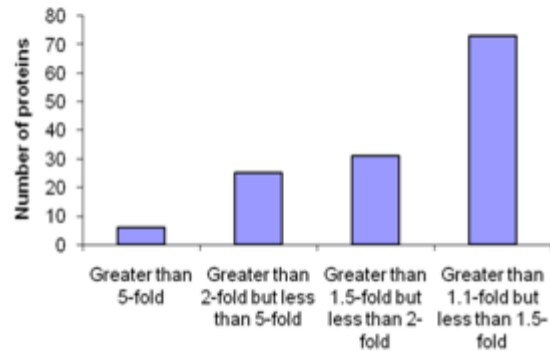

Supplement: MOESM8 [file 9460502]
